Urol Int 2021;105:1129  
DOI: 10.1159/000519830

Published online: October 6, 2021

In the article “Synchronous Partial Nephrectomy and Renal Artery Aneurysm Repair in Bilateral Renal Cancers: Case Report and Literature Review” [Urol Int. 2021;105:525–9. doi 10.1159/511755] by Foschi et al., the name of the eighth author should correctly read Yamume Tshomba.
